# Supplementary material
Source: MDPI journal article supplement (https://www.mdpi.com/2073-4395/12/10/2274)

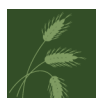

Chromatograms of the EOs and PPCs

Figure S1: Chromatograms of the EOs obtained by GC/MS assay

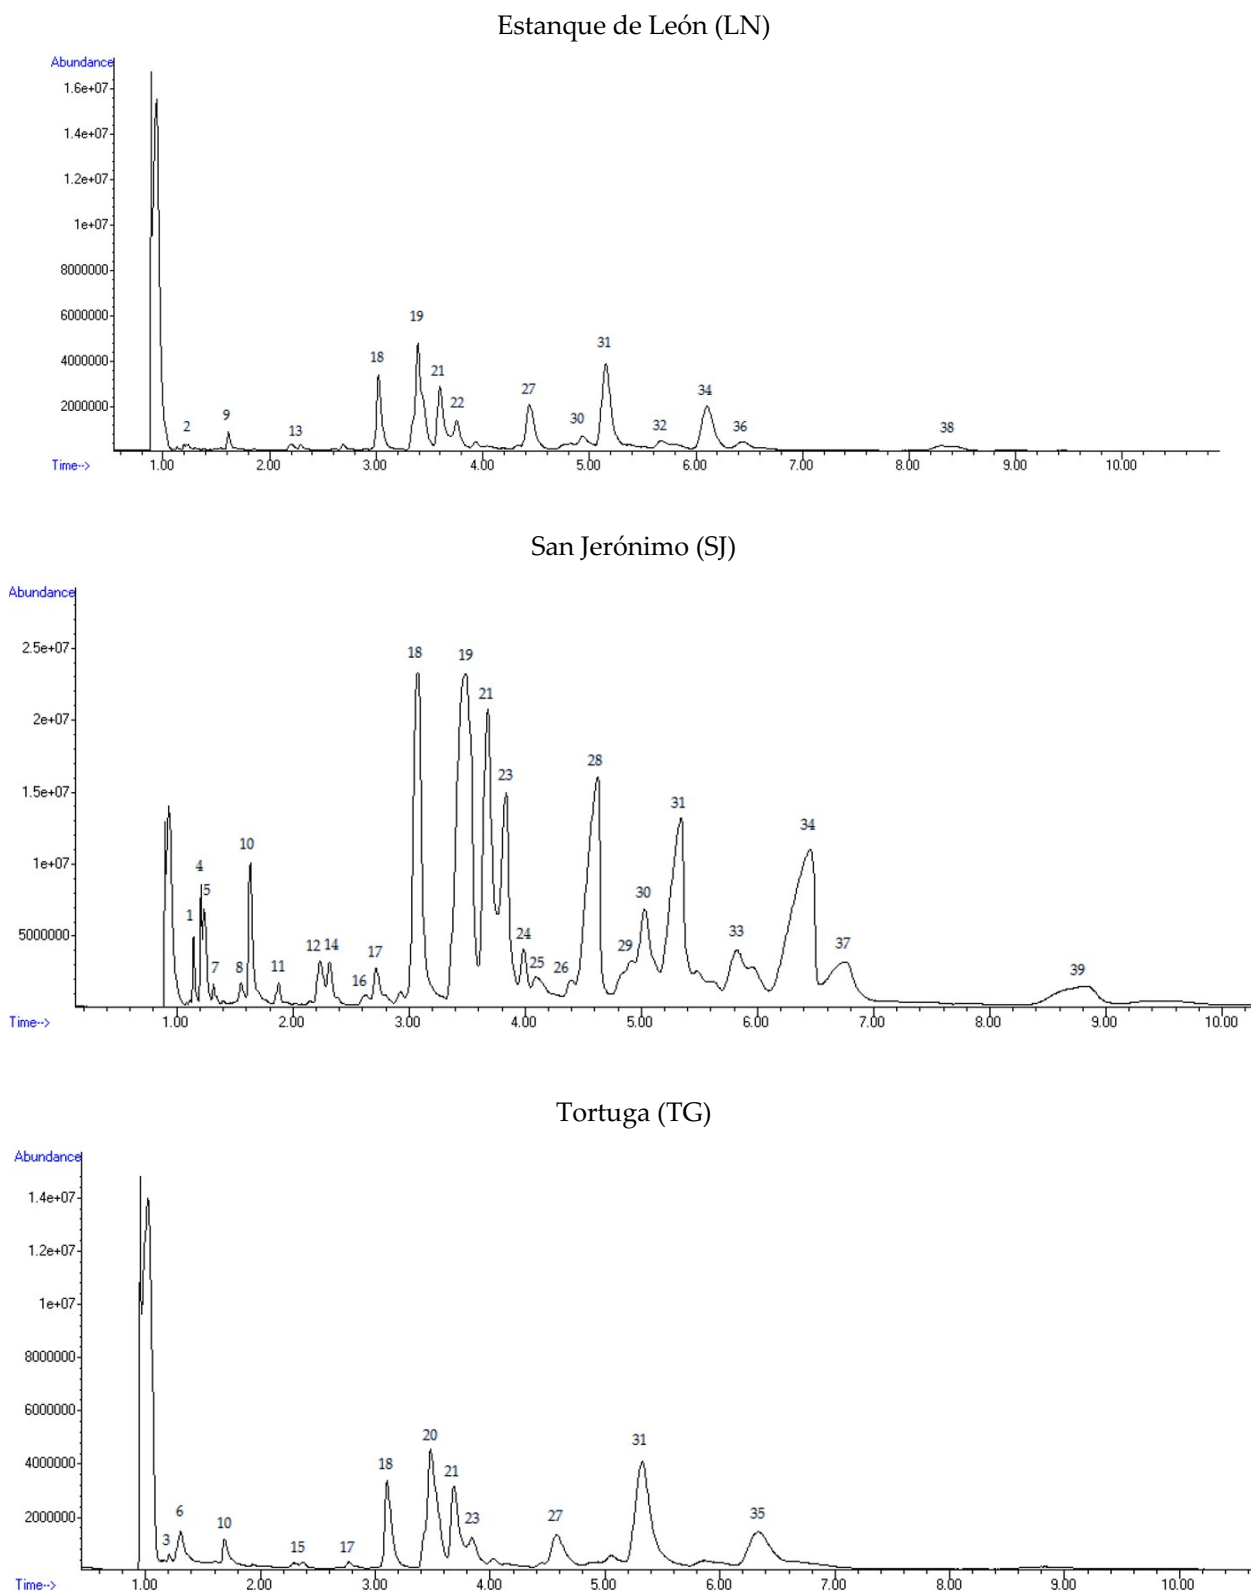

Figure S2: Chromatograms of PPCs obtained by UPLC/Q-TOF M<sup>2</sup>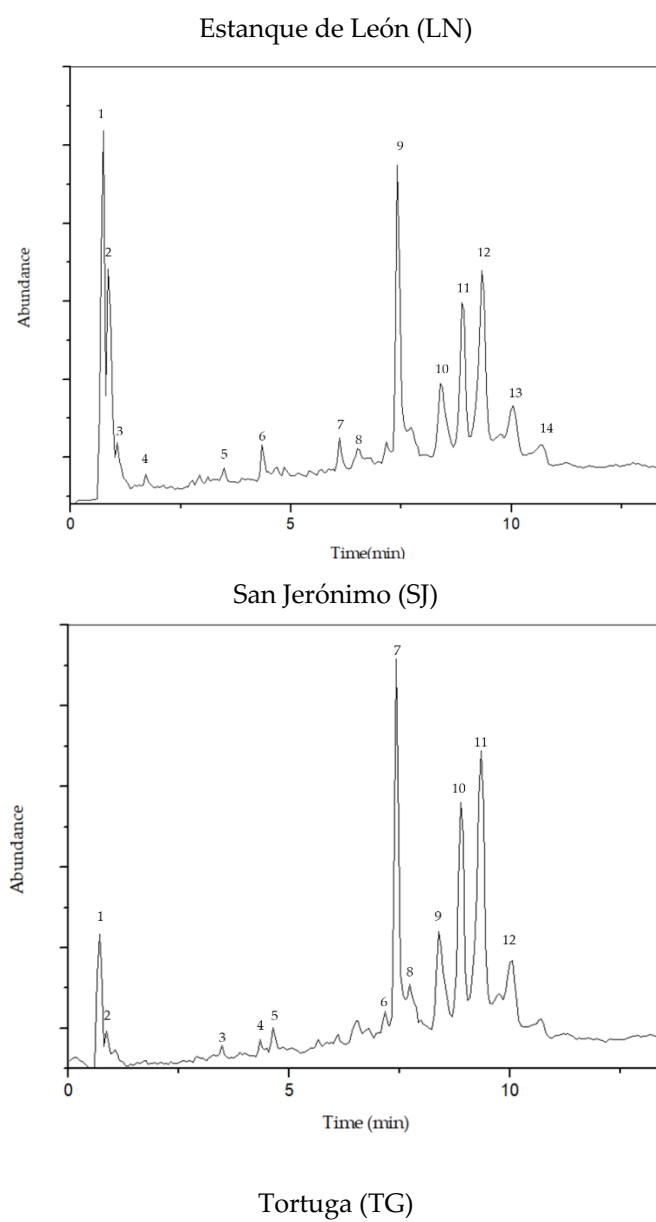

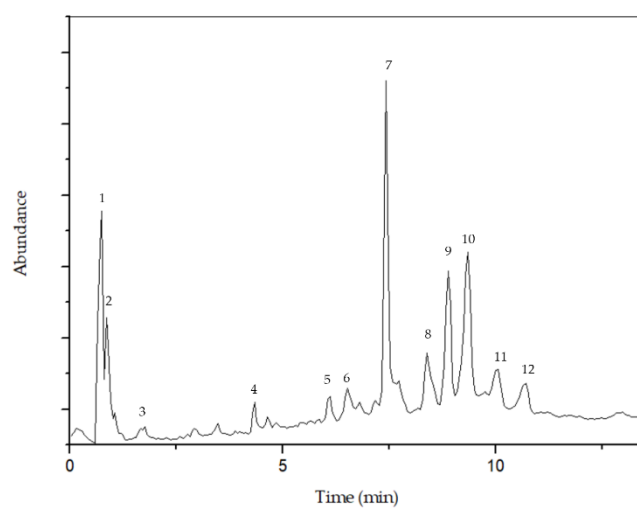

Supplement: s1 [file s1]
